# Supplementary material for: Identification of Sex and Female’s Reproductive Stage in Commercial Fish Species through the Quantification of Ribosomal Transcripts in Gonads
Source: PubMed Central journal article supplement (PMC4771027; doi:10.1371/journal.pone.0149711), 2016-02-26
Supplement: pone.0149711.s004.pdf [file pone.0149711.s004.pdf]

Data used in:

Figure 2. Figure 3.

Supplementary Figure 3

| Species       | 5S rRNA<br>T.C.A | 18S rRNA<br>T.C.A | Sex |
|---------------|------------------|-------------------|-----|
| Bogue         | 1379,4           | 3,4               | F   |
|               | 183,8            | 0,1               | F   |
|               | 1                | 13,1              | M   |
|               | 113,1            | 0,1               | F   |
|               | 168,7            | 0,1               | F   |
|               | 130,5            | 0,1               | F   |
|               | 250,3            | 0,1               | F   |
|               | 94,3             | 0,1               | F   |
|               | 85,5             | 1,3               | F   |
| Chub mackerel | 6089,4           | 28,6              | F   |
|               | 6392,8           | 66,1              | F   |
|               | 37,6             | 240,1             | M   |
|               | 46               | 195,5             | M   |
|               | 3962,6           | 71,7              | F   |
|               | 3655,8           | 31                | F   |
|               | 7,6              | 78,3              | M   |
|               | 2,1              | 26,3              | M   |
|               | 126,2            | 0,1               | F   |
|               | 8,9              | 24,5              | M   |
|               | 4,7              | 9,2               | M   |
|               | 172,8            | 0,1               | F   |
|               | 170,5            | 1,9               | F   |
|               | 100,7            | 0,1               | F   |
| Hake          | 6796,7           | 304,2             | F   |
|               | 69               | 936,2             | M   |
|               | 5,4              | 34,8              | M   |
|               | 989,6            | 159,5             | F   |
|               | 6812,5           | 200,7             | F   |
|               | 6740,4           | 136,3             | F   |
|               | 4381,1           | 250,7             | F   |
|               | 13               | 50,8              | M   |
|               | 4639,3           | 306,8             | F   |
|               | 81               | 425,1             | M   |
| 5126,3        | 141,2            | F                 |     |
| Blue withing  | 218,9            | 15,2              | F   |
|               | 251,9            | 18,2              | F   |
|               | 228,3            | 13,1              | F   |
|               | 231,5            | 8,8               | F   |
|               | 241,8            | 10,7              | F   |
|               | 229,1            | 13,3              | F   |
|               | 140,2            | 10,3              | F   |
|               | 279              | 12,4              | F   |
|               | 4,8              | 1539              | M   |
|               | 257,6            | 9,2               | F   |
|               | 283,9            | 13,8              | F   |

M: testis

F: ovary

|                |        |       |   |
|----------------|--------|-------|---|
|                | 4      | 3,3   | M |
|                | 339,8  | 24,6  | F |
|                | 293,2  | 15,8  | F |
|                | 303,4  | 14,6  | F |
| Megrin         | 226,17 | 40,7  | F |
|                | 15,2   | 163,3 | F |
|                | 27,4   | 111,2 | F |
|                | 37,8   | 112,8 | F |
|                | 225,2  | 75,9  | F |
|                | 46     | 93,4  | F |
|                | 403,2  | 95,5  | F |
|                | 143    | 83,7  | F |
|                | 62,2   | 222,2 | F |
|                | 270,9  | 117,6 | F |
|                | 0,2    | 14,4  | M |
|                | 0,1    | 5,1   | M |
|                | 0,1    | 16,5  | M |
|                | 0,1    | 12,3  | M |
|                | 487,8  | 22,2  | F |
|                | 0,2    | 12,5  | M |
|                | 431,4  | 20,1  | F |
|                | 183,3  | 13,9  | F |
|                | 136,7  | 18,8  | F |
|                | 0,1    | 26,6  | M |
|                | 10,2   | 37,7  | F |
|                | 14,5   | 35,1  | F |
|                | 21,2   | 25,3  | F |
|                | 9,2    | 44,7  | F |
|                | 10,8   | 24,4  | F |
|                | 12,3   | 69    | F |
|                | 12,6   | 32,4  | F |
|                | 35,6   | 18    | F |
|                | 9,5    | 37,6  | F |
|                | 9,1    | 35,9  | F |
| 25,7           | 8,1    | F     |   |
| 18,1           | 43     | F     |   |
| Horse mackerel | 46,6   | 14,4  | F |
|                | 86,1   | 5,8   | F |
|                | 2,6    | 125,9 | M |
|                | 4,1    | 141   | M |
|                | 64     | 115,5 | M |
|                | 3,3    | 90,7  | M |
|                | 1,3    | 45,3  | M |
|                | 3,6    | 82,9  | M |
|                | 8,4    | 145,3 | M |
|                | 2,2    | 94,8  | M |
|                | 2,4    | 55,3  | M |
|                | 5,3    | 67,8  | M |
|                | 2,3    | 72,8  | M |
|                | 135,1  | 44    | F |

|                   |       |       |   |
|-------------------|-------|-------|---|
|                   | 31,9  | 3,9   | F |
|                   | 4,8   | 30    | M |
|                   | 37,9  | 11,7  | F |
|                   | 4,2   | 22,2  | M |
|                   | 0,8   | 30,9  | M |
|                   | 44,8  | 3,3   | F |
|                   | 29,6  | 7,2   | F |
|                   | 1,7   | 38,2  | M |
|                   | 0,1   | 28,3  | M |
|                   | 3,9   | 31,1  | M |
| Zebrafish         | 44,8  | 11,1  | F |
|                   | 70,5  | 9,2   | F |
|                   | 75,3  | 7,8   | F |
|                   | 15,4  | 7,7   | F |
|                   | 18,3  | 13,4  | F |
|                   | 8,4   | 8,7   | M |
|                   | 0,2   | 2,1   | M |
|                   | 4     | 7,8   | M |
|                   | 7,4   | 17    | M |
|                   | 9,2   | 23,1  | M |
| Atlantic mackerel | 6     | 83,6  | M |
|                   | 5,3   | 32,5  | M |
|                   | 16,1  | 138   | M |
|                   | 15,4  | 55,9  | M |
|                   | 64,9  | 32,9  | F |
|                   | 48,7  | 22,7  | F |
|                   | 31,4  | 18,4  | F |
|                   | 38,3  | 18,6  | F |
|                   | 21    | 110,5 | M |
|                   | 34,5  | 28,3  | F |
|                   | 102,9 | 91,3  | F |
|                   | 36,6  | 28    | F |
| 9,5               | 49,8  | M     |   |
| Pilchard          | 143,2 | 80,7  | F |
|                   | 105,6 | 181,8 | F |
|                   | 67    | 84,7  | F |
|                   | 22,1  | 27,9  | M |
|                   | 20    | 144,3 | M |
|                   | 102,6 | 203,6 | F |
|                   | 0,8   | 148,8 | M |
|                   | 34,1  | 143,7 | F |
|                   | 18,6  | 145,2 | M |
|                   | 20,2  | 257,3 | M |
|                   | 93,6  | 164,9 | F |
|                   | 169,3 | 183   | F |
|                   | 2,8   | 43,3  | F |
|                   | 2,2   | 81,5  | M |
|                   | 7,4   | 91,5  | F |
|                   | 11,2  | 144,8 | F |
|                   | 17,6  | 79,5  | F |

|         |       |       |   |
|---------|-------|-------|---|
| Anchovy | 1,3   | 76,2  | M |
|         | 1,4   | 96,4  | M |
|         | 1,1   | 92,2  | M |
|         | 4,3   | 29,6  | F |
|         | 10,3  | 44,6  | F |
|         | 2,1   | 100,3 | M |
|         | 3,6   | 120,6 | M |
|         | 4,4   | 150   | M |
|         | 25,6  | 150,6 | F |
|         | 10,6  | 435,3 | M |
|         | 20,5  | 28,8  | F |
|         | 2,2   | 127,5 | M |
|         | 13,8  | 44,7  | F |
|         | 11,2  | 41,1  | F |
|         | 39,4  | 34,1  | F |
|         | 30,3  | 31,5  | F |
|         | 1,8   | 80,2  | M |
|         | 3,8   | 123   | M |
|         | 2,8   | 108,6 | M |
|         | 19,9  | 30,1  | F |
|         | 3,9   | 138,6 | M |
| 3,9     | 94,7  | M     |   |
| 13,2    | 77,5  | M     |   |
| 26,5    | 51,2  | F     |   |
| 3,6     | 131,4 | M     |   |
| 31      | 69,7  | F     |   |
