# Supplementary material for: Identification of Sex and Female’s Reproductive Stage in Commercial Fish Species through the Quantification of Ribosomal Transcripts in Gonads
Source: PubMed Central journal article supplement (PMC4771027; doi:10.1371/journal.pone.0149711), 2016-02-26
Supplement: pone.0149711.s005.pdf [file pone.0149711.s005.pdf]

**Data used in:** **Figure 4.**

**Figure 3**

| CT value  |              | Sex/Ovarian developmental stage | CT value  |                | CT value  |                 | Ovarian developmental stage |
|-----------|--------------|---------------------------------|-----------|----------------|-----------|-----------------|-----------------------------|
| Sample ID | <b>gtf3a</b> |                                 | Sample ID | <b>5S rRNA</b> | Sample ID | <b>18S rRNA</b> |                             |
| GA1.1     | 23,942       | CA                              | GA1.1     | 24,4323        | GA1.1     | 24,4323         | CA                          |
| GA1.1     | 23,858       | CA                              | GA1.1     | 23,7287        | GA1.1     | 23,7287         | CA                          |
| GA1.1     | 23,881       | CA                              | GA1.1     | 23,8812        | GA1.1     | 23,8812         | CA                          |
| GA1.2     | 26,975       | AV                              | GA1.2     | 27,2492        | GA1.2     | 27,2492         | AV                          |
| GA1.2     | 27,095       | AV                              | GA1.2     | 26,9709        | GA1.2     | 26,9709         | AV                          |
| GA1.2     | 27,031       | AV                              | GA1.2     | 27,3482        | GA1.2     | 27,3482         | AV                          |
| GA1.3     | 27,179       | AV                              | GA1.3     | 26,3295        | GA1.3     | 26,3295         | AV                          |
| GA1.3     | 27,093       | AV                              | GA1.3     | 26,4795        | GA1.3     | 26,4795         | AV                          |
| GA1.3     | 27,088       | AV                              | GA1.3     | 26,267         | GA1.3     | 26,267          | AV                          |
| GA1.4     | 26,052       | AV                              | GA1.4     | 25,9339        | GA1.4     | 25,9339         | AV                          |
| GA1.4     | 25,853       | AV                              | GA1.4     | 25,987         | GA1.4     | 25,987          | AV                          |
| GA1.4     | 25,965       | AV                              | GA1.4     | 25,681         | GA1.4     | 25,681          | AV                          |
| GA1.5     | 22,704       | CA                              | GA1.5     | 25             | GA1.5     | 25              | CA                          |
| GA1.5     | 22,942       | CA                              | GA1.5     | 24,2357        | GA1.5     | 24,2357         | CA                          |
| GA1.5     | 22,882       | CA                              | GA1.5     | 24,2243        | GA1.5     | 24,2243         | CA                          |
| GA1.6     | 26,217       | AV                              | GA1.6     | 24,2143        | GA1.6     | 24,2143         | AV                          |
| GA1.6     | 26,461       | AV                              | GA1.6     | 25,1292        | GA1.6     | 25,1292         | AV                          |
| GA1.6     | 26,334       | AV                              | GA1.6     | 25,8508        | GA1.6     | 25,8508         | AV                          |
| GA1.7     | 23,937       | CA                              | GA1.7     | 23,7096        | GA1.7     | 23,7096         | CA                          |
| GA1.7     | 23,968       | CA                              | GA1.7     | 23,8189        | GA1.7     | 23,8189         | CA                          |
| GA1.7     | 23,940       | CA                              | GA1.7     | 23,691         | GA1.7     | 23,691          | CA                          |
| GA1.8     | 27,898       | AV                              | GA1.8     | 24,8731        | GA1.8     | 24,8731         | AV                          |
| GA1.8     | 27,972       | AV                              | GA1.8     | 25,0821        | GA1.8     | 25,0821         | AV                          |
| GA1.8     | 27,818       | AV                              | GA1.8     | 25,2639        | GA1.8     | 25,2639         | AV                          |
| GA1.9     | 24,207       | CA                              | GA1.9     | 25,2212        | GA1.9     | 25,2212         | CA                          |
| GA1.9     | 24,339       | CA                              | GA1.9     | 25,096         | GA1.9     | 25,096          | CA                          |
| GA1.9     | 24,387       | CA                              | GA1.9     | 25,148         | GA1.9     | 25,148          | CA                          |
| GA1.10    | 25,965       | AV                              | GA1.10    | 25,281         | GA1.10    | 25,281          | AV                          |
| GA1.10    | 25,989       | AV                              | GA1.10    | 25,19          | GA1.10    | 25,19           | AV                          |
| GA1.10    | 25,783       | AV                              | GA1.10    | 25,4884        | GA1.10    | 25,4884         | AV                          |
| GA1.11    | 24,274       | CA                              | GA1.11    | 23,8574        | GA1.11    | 23,8574         | CA                          |
| GA1.11    | 23,877       | CA                              | GA1.11    | 23,7112        | GA1.11    | 23,7112         | CA                          |
| GA1.11    | 23,880       | CA                              | GA1.11    | 23,6446        | GA1.11    | 23,6446         | CA                          |
| GA1.15    | 26,035       | AV                              | GA1.15    | 25,3821        | GA1.15    | 25,3821         | AV                          |
| GA1.15    | 26,267       | AV                              | GA1.15    | 25,4842        | GA1.15    | 25,4842         | AV                          |
| GA1.15    | 26,080       | AV                              | GA1.15    | 25,4976        | GA1.15    | 25,4976         | AV                          |
| GA2.1     | 40,000       | M                               | GA2.5     | 22,9043        | GA2.5     | 22,6119         | PV                          |
| GA2.1     | 40,000       | M                               | GA2.5     | 22,6119        | GA2.5     | 22,4548         | PV                          |
| GA2.1     | 40,000       | M                               | GA2.5     | 22,4548        | GA2.5     | 23,6164         | PV                          |
| G2.2      | 37,453       | M                               | GA2.11    | 23,7107        | GA2.11    | 23,4811         | PV                          |
| G2.2      | 38,355       | M                               | GA2.11    | 23,4811        | GA2.11    | 23,6266         | PV                          |
| G2.2      | 37,456       | M                               | GA2.11    | 23,6266        | GA2.11    | 23,2903         | PV                          |
| GA2.3     | 35,611       | M                               | GA2.12    | 23,2903        | GA2.12    | 23,8184         | PV                          |

|        |        |    |        |                    |        |         |    |
|--------|--------|----|--------|--------------------|--------|---------|----|
| GA2.3  | 36,672 | M  | GA2.12 | 23,8184            | GA2.12 | 23,5948 | PV |
| GA2.3  | 36,683 | M  | GA2.12 | <del>23,8184</del> | GA2.12 | 23,3668 | PV |
| GA2.4  | 36,032 | M  | GA2.13 | 23,5948            | GA2.13 | 23,5163 | PV |
| GA2.4  | 37,480 | M  | GA2.13 | 23,3668            | GA2.13 | 24,1797 | PV |
| GA2.4  | 36,057 | M  | GA2.13 | 23,5163            | GA2.13 | 23,8718 | PV |
| GA2.5  | 22,302 | PV | GA3.8  | 24,4662            | GA3.8  | 27,0896 | CA |
| GA2.5  | 22,408 | PV | GA3.8  | 24,6346            | GA3.8  | 27,1206 | CA |
| GA2.5  | 22,407 | PV | GA3.8  | 25,229             | GA3.8  | 27,0334 | CA |
| GA2.7  | 36,218 | M  | GA3.11 | 26,4037            | GA3.11 | 28,4954 | CA |
| GA2.7  | 36,982 | M  | GA3.11 | 26,1496            | GA3.11 | 27      | CA |
| GA2.7  | 35,323 | M  | GA3.11 | 25,8247            | GA3.11 | 28,5201 | CA |
| GA2.11 | 26,854 | PV |        |                    |        |         |    |
| GA2.11 | 26,744 | PV |        |                    |        |         |    |
| GA2.11 | 26,725 | PV |        |                    |        |         |    |
| GA2.12 | 24,115 | PV |        |                    |        |         |    |
| GA2.12 | 24,189 | PV |        |                    |        |         |    |
| GA2.12 | 24,055 | PV |        |                    |        |         |    |
| GA2.13 | 23,886 | PV |        |                    |        |         |    |
| GA2.13 | 24,021 | PV |        |                    |        |         |    |
| GA2.13 | 24,090 | PV |        |                    |        |         |    |
| GA2.14 | 35,465 | M  |        |                    |        |         |    |
| GA2.14 | 35,347 | M  |        |                    |        |         |    |
| GA2.14 | 35,087 | M  |        |                    |        |         |    |
| GA3.8  | 23,707 | CA |        |                    |        |         |    |
| GA3.8  | 23,638 | CA |        |                    |        |         |    |
| GA3.8  | 23,523 | CA |        |                    |        |         |    |
| GA3.11 | 24,205 | CA |        |                    |        |         |    |
| GA3.11 | 24,380 | CA |        |                    |        |         |    |
| GA3.11 | 24,299 | CA |        |                    |        |         |    |

| M: testis | F: ovary                    |
|-----------|-----------------------------|
|           | PV:previtellogenic stage    |
|           | CA: cortical alveoli stage  |
|           | AV: advanced vitellogenesis |
