# Supplementary material for: Identification of Sex and Female’s Reproductive Stage in Commercial Fish Species through the Quantification of Ribosomal Transcripts in Gonads
Source: PubMed Central journal article supplement (PMC4771027; doi:10.1371/journal.pone.0149711), 2016-02-26
Supplement: pone.0149711.s006.pdf [file pone.0149711.s006.pdf]

**S3 Table. *gtf3a* sequences obtained from the different fish species studied.** Table depicts size of amplified and sequenced fragments, and e-value through BlastX analysis with the most similar sequences in Genbank. For comparative purposes the *Danio rerio gtf3ab* sequence (NP\_001083013) appears in all the cases.

| Species                | Genbank accession number | Size (bp) | E-value         | BlastX<br>Most similar sequence and Genbank accession number                                                  |
|------------------------|--------------------------|-----------|-----------------|---------------------------------------------------------------------------------------------------------------|
| <i>M. merluccius</i>   | JQ928630                 | 523       | 3e-76<br>7e-54  | <i>Oreochromis niloticus</i> PREDICTED TFIIIA,XP_003443591<br><i>Danio rerio</i> , TFIIIA, b NP_001083013     |
| <i>S. scombrus</i>     | JQ928631                 | 699       | 3e-133<br>5e-93 | <i>Oreochromis niloticus</i> PREDICTED TFIIIA,XP_003443591<br><i>Danio rerio</i> , TFIIIA, b NP_001083013     |
| <i>S. colias</i>       | JQ928632                 | 707       | 2e-124<br>3e-96 | <i>Oreochromis niloticus</i> PREDICTED TFIIIA,XP_003443591<br><i>Danio rerio</i> , TFIIIA, b NP_001083013     |
| <i>L. whiffiagonis</i> | JQ928633                 | 691       | 2e-134<br>1e-93 | <i>Oreochromis niloticus</i> PREDICTED TFIIIA,XP_003443591<br><i>Danio rerio</i> , TFIIIA, b NP_001083013     |
| <i>S. pilchardus</i>   | JQ928634                 | 636       | 6e-99<br>2e-91  | <i>Danio rerio</i> , TFIIIA, b NP_001083013<br><i>Oreochromis niloticus</i> PREDICTED TFIIIA,XP_003443591     |
| <i>M. poutassou</i>    | KC191719                 | 594       | 2e-70<br>3e-46  | <i>Takifugu rubripes</i> , PREDICTED TFIIIA like, XP 003968009<br><i>Danio rerio</i> , TFIIIA, b NP_001083013 |
| <i>T. trachurus</i>    | KC191721                 | 594       | 1e-112<br>2e-68 | <i>Maylandia zebra</i> , PREDICTED TFIIIA like, XP 004546742<br><i>Danio rerio</i> , TFIIIA, b NP_001083013   |
